# Supplementary material
Source: MDPI journal article supplement (https://www.mdpi.com/2297-8739/8/12/245)

Supplementary materials

# Hemp Chemotype Definition by Cannabinoids Characterization Using LC-ESI(+)-LTQ-FTICR MS and Infrared Multiphoton Dissociation

Filomena Lelario <sup>1,\*</sup>, Raffaella Pascale <sup>2</sup>, Giuliana Bianco <sup>1</sup>, Laura Scrano <sup>3</sup> and Sabino Aurelio Bufo <sup>1,4</sup>

**Figure S1.** CID-MS<sup>n</sup> spectra of ion at  $m/z$  315. Relative collision energies ranging from 25% to 35% were applied.

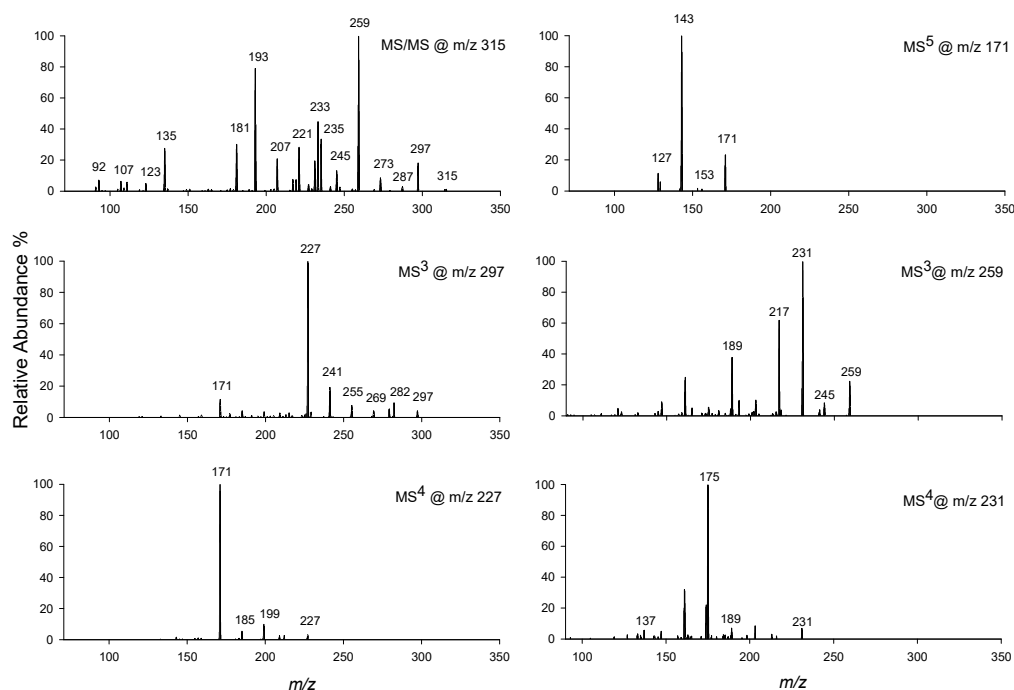

**Citation:** Lelario, F.; Pascale, R.; Bianco, G.; Scrano, L.; Bufo, S.A. Hemp Chemotype Definition by Cannabinoids Characterization Using LC-ESI(+)-LTQ-FTICR MS and Infrared Multiphoton Dissociation. *Separations* **2021**, *8*, 245. <https://doi.org/10.3390/separations8120245>

Academic Editor: Ki Hyun Kim

Received: 15 November 2021

Accepted: 10 December 2021

Published: 13 December 2021

**Publisher's Note:** MDPI stays neutral with regard to jurisdictional claims in published maps and institutional affiliations.

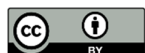

**Copyright:** © 2021 by the authors. Licensee MDPI, Basel, Switzerland. This article is an open access article distributed under the terms and conditions of the Creative Commons Attribution (CC BY) license (<http://creativecommons.org/licenses/by/4.0/>).

**Figure S2.** CID-MS<sup>n</sup> spectra of ion at  $m/z$  311. Relative collision energies ranging from 25% to 35% were applied.

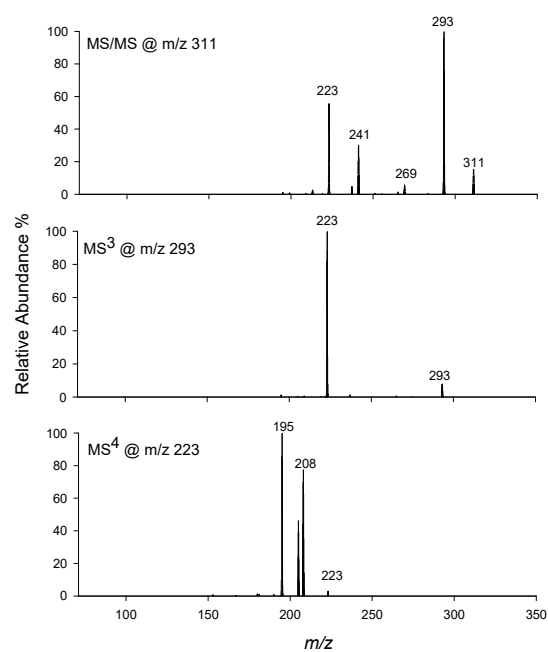

Supplement: s1 [file s1]
